# Supplementary material for: A computational approach towards understanding hydrogen gas adsorption in Co–MIL-88A
Source: Royal Society of Chemistry journal article supplement (doi:10.1039/c7ra05801b), 2017-01-01
Supplement: c7ra05801b1.pdf [file c7ra05801b1.pdf]

**Electronic supplementary information**

**A Computational Approach Towards Understanding Hydrogen Gas Adsorption in Co-MIL-88A**

**Nguyen Thi Xuan Huynh,<sup>ab</sup> O My Na,<sup>a</sup> Viorel Chihaiac and Do Ngoc Son<sup>\*a</sup>**

<sup>a</sup>*Ho Chi Minh City University of Technology, VNU-HCM, 268 Ly Thuong Kiet Street, District 10, Ho Chi Minh City, Vietnam*

<sup>b</sup>*Quy Nhon University, 170 An Duong Vuong Street, Quy Nhon City, Binh Dinh Province, Vietnam*

<sup>c</sup>*Institute of Physical Chemistry “Ilie Murgulescu” of the Romanian Academy, Splaiul Independentei 202, Sector 6, 060021 Bucharest, Romania*

<sup>\*</sup> *Email : [dnson@hcmut.edu.vn](mailto:dnson@hcmut.edu.vn)*

## List of Figures and Tables

**Figure S1.** The charge density difference of the H<sub>2</sub> molecule at the hollow site with Isosurface =  $2 \times 10^{-5} e/\text{Bohr}^3$ . Yellow and cyan clouds represent the charge gain and loss, respectively.

**Figure S2.** The electronic density of state of the hydrogen molecule and the  $\mu_3$ -O atoms at the sites: hollow (a), ligand (b), metal side-on (c), and metal end-on (d).

**Figure S3.** Absolute hydrogen uptake in Co-MIL-88A with and without electrostatic interaction between H<sub>2</sub> and the MOF at 77 K (a) and 288 K (b).

**Figure S4.** The density of the adsorbed hydrogen atoms in the Co-MIL-88A. The blue, red, brown, white balls represent the cobalt, oxygen, carbon, and hydrogen atoms of MOF, respectively. Each pair of the green balls represents an adsorbed hydrogen molecule. The blue, red and pink bands refer the hollow, ligand and metal sites, respectively.

**Table S1.** The frequency of the vibrational modes,  $\nu$  (cm<sup>-1</sup>) for the favorable H<sub>2</sub> adsorption sites and the free hydrogen molecule.

**Table S2.** The average atomic point charges used in GCMC simulations.

**Table S3.** Absolute and excess hydrogen uptakes in Co-MIL-88A with and without electrostatic interaction at 77 K.

**Table S4.** Absolute and excess hydrogen uptakes in Co-MIL-88A with and without electrostatic interaction at 298 K.

**Table S5.** The average distance between the H<sub>2</sub> molecule and the nearest atoms of Co-MIL-88A (in Å)

**Table S6.** The structure of the optimized Co-MIL-88A (the POSCAR format of VASP)

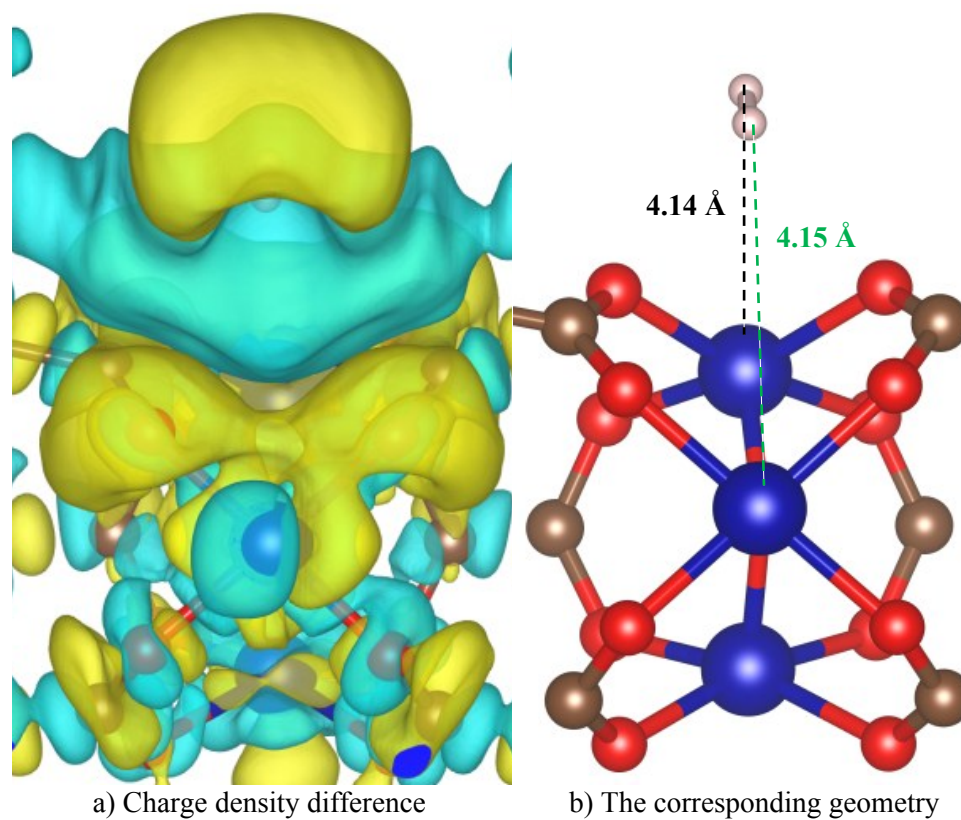

**Figure S1.** The charge density difference of H<sub>2</sub> at the hollow site with Isosurface =  $2 \times 10^{-5} e/\text{Bohr}^3$ . Yellow and cyan clouds represent the charge gain and loss, respectively.

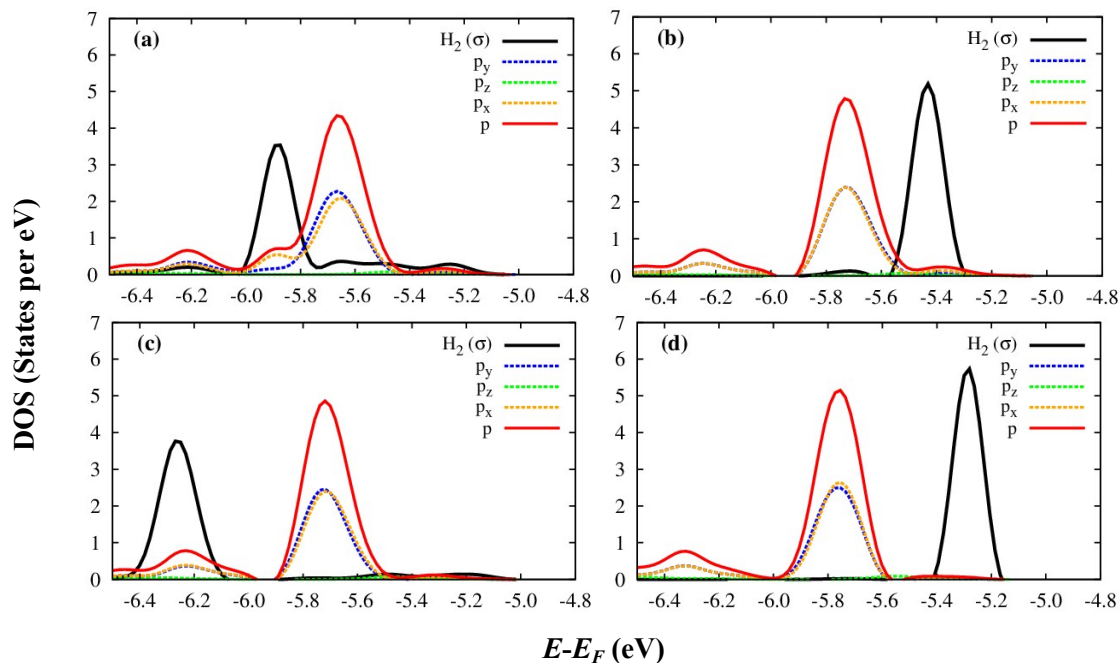

**Figure S2.** The electronic density of state of the hydrogen molecule and the  $\mu_3$ -O atoms at the sites: hollow (a), ligand (b), metal side-on (c), and metal end-on (d).

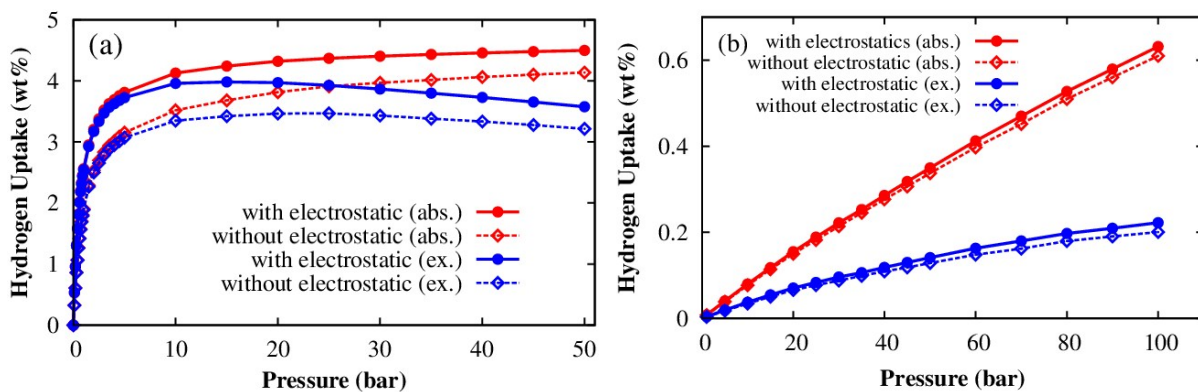

**Figure S3.** Absolute hydrogen uptake in Co-MIL-88A with and without electrostatic interaction between  $H_2$  and the MOF at 77 K (a) and 288 K (b).

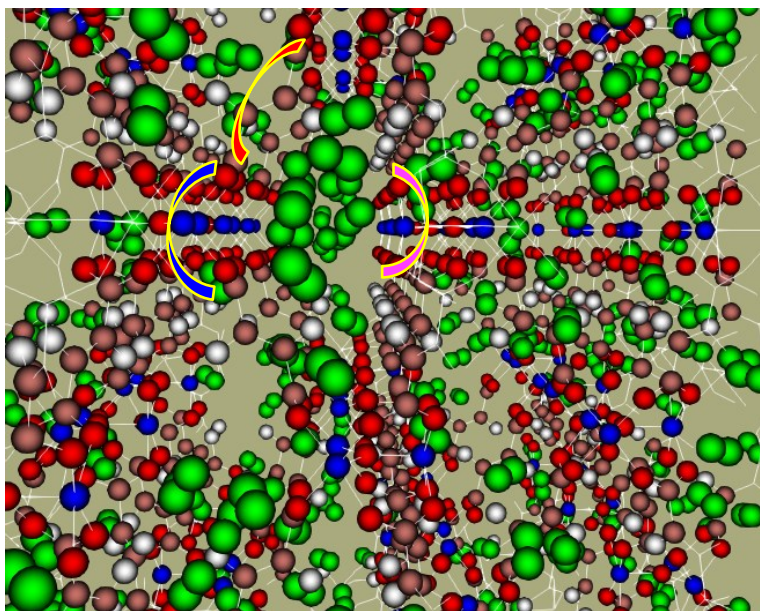

a) At 77 K, 0.1 bar

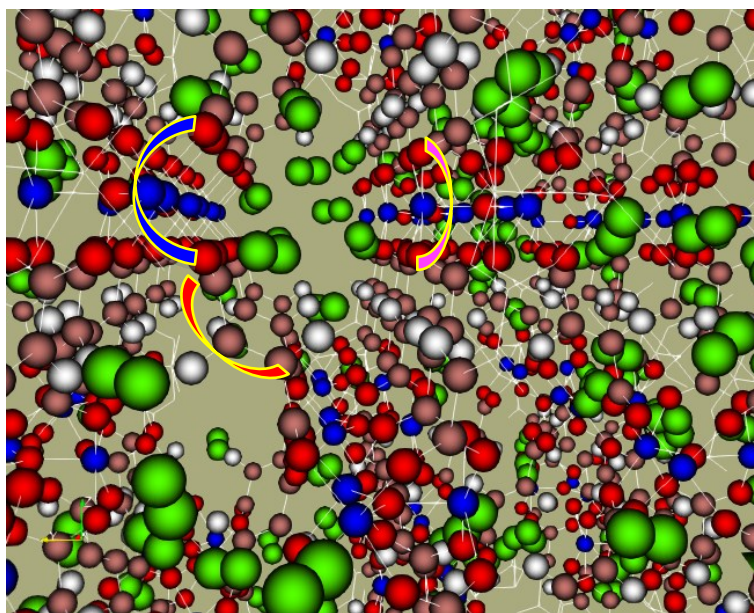

b) At 298 K, 10 bar

**Figure S4.** The density of the adsorbed hydrogen molecules in the Co-MIL-88A. The blue, red, brown, white balls represent the cobalt, oxygen, carbon, and hydrogen atoms of MOF, respectively. Each pair of the green balls represents an adsorbed hydrogen molecule. The blue, red and pink bands refer the hollow, ligand and metal sites, respectively.

**Table S1.** The frequency of the vibrational modes,  $\nu$  (cm<sup>-1</sup>) for the favorable H<sub>2</sub> adsorption sites and the free hydrogen molecule.

| Sites               | $f_1$ | $f_2$ | $f_3$ | $f_4$ | $f_5$ | $f_6$ | Total |
|---------------------|-------|-------|-------|-------|-------|-------|-------|
| Hollow              | 4402  | 312   | 224   | 193   | 114   | 77    | 5322  |
| Ligand              | 4402  | 324   | 251   | 187   | 42    | 103   | 5310  |
| Metal side-on       | 4409  | 277   | 139   | 103   | 72    | 37    | 5036  |
| Metal end-on        | 4421  | 119   | 11    | 95    | 182   | 201   | 5029  |
| Free H <sub>2</sub> | 4448  | 52    | 10    | 0     | 82    | 103   | 4695  |

**Table S2.** The average atomic point charges used in GCMC simulations

| Atom type | Our DDEC charge calculation | Taken from RASPA <sup>1</sup> |
|-----------|-----------------------------|-------------------------------|
| Co        | 1.082                       | 1.139                         |
| C1        | 0.753                       | 0.832                         |
| C2        | -0.237                      | -0.292                        |
| C3        | 0.362                       | 0.315                         |
| C4        | -0.139                      | -0.110                        |
| O1        | -0.666                      | -0.684                        |
| O2        | -0.606                      | -0.645                        |
| O3        | -0.682                      | -0.731                        |
| H         | 0.133                       | 0.176                         |

<sup>1</sup>D. Dubbeldam, S. Calero, D. E. Ellis and R. Q. Snurr, *Mol. Simul.*, 2016, **42**, 81–101

**Table S3.** Absolute and excess hydrogen uptakes in Co-MIL-88A with and without electrostatic interaction at 77 K

| P (bar) | LJ+Coulomb Interaction (wt%) |        | LJ Interaction (wt%) |        | Coulomb Interaction (wt%) |        | Percentage of Electrostatic Interaction (%) |        |
|---------|------------------------------|--------|----------------------|--------|---------------------------|--------|---------------------------------------------|--------|
|         | Absolute                     | Excess | Absolute             | Excess | Absolute                  | Excess | Absolute                                    | Excess |
| 0.1     | 0.53                         | 0.53   | 0.33                 | 0.33   | 0.2                       | 0.2    | 37.74                                       | 37.74  |
| 0.2     | 0.96                         | 0.96   | 0.61                 | 0.61   | 0.35                      | 0.35   | 36.46                                       | 36.46  |
| 0.3     | 1.31                         | 1.31   | 0.86                 | 0.86   | 0.45                      | 0.45   | 34.35                                       | 34.35  |
| 0.4     | 1.59                         | 1.58   | 1.07                 | 1.06   | 0.52                      | 0.52   | 32.70                                       | 32.91  |
| 0.5     | 1.82                         | 1.81   | 1.27                 | 1.26   | 0.55                      | 0.55   | 30.22                                       | 30.39  |
| 0.6     | 2.02                         | 2.01   | 1.43                 | 1.42   | 0.59                      | 0.59   | 29.21                                       | 29.35  |
| 0.7     | 2.2                          | 2.18   | 1.58                 | 1.57   | 0.62                      | 0.61   | 28.18                                       | 27.98  |
| 0.8     | 2.33                         | 2.31   | 1.7                  | 1.69   | 0.63                      | 0.62   | 27.04                                       | 26.84  |
| 0.9     | 2.45                         | 2.44   | 1.8                  | 1.79   | 0.65                      | 0.65   | 26.53                                       | 26.64  |
| 1.0     | 2.56                         | 2.54   | 1.9                  | 1.89   | 0.66                      | 0.65   | 25.78                                       | 25.59  |
| 1.5     | 2.95                         | 2.93   | 2.29                 | 2.27   | 0.66                      | 0.66   | 22.37                                       | 22.53  |
| 2.0     | 3.21                         | 3.17   | 2.53                 | 2.5    | 0.68                      | 0.67   | 21.18                                       | 21.14  |
| 2.5     | 3.38                         | 3.34   | 2.7                  | 2.65   | 0.68                      | 0.69   | 20.12                                       | 20.66  |
| 3.0     | 3.52                         | 3.47   | 2.83                 | 2.78   | 0.69                      | 0.69   | 19.60                                       | 19.88  |
| 3.5     | 3.63                         | 3.57   | 2.94                 | 2.88   | 0.69                      | 0.69   | 19.01                                       | 19.33  |
| 4.0     | 3.69                         | 3.63   | 3.01                 | 2.95   | 0.68                      | 0.68   | 18.43                                       | 18.73  |
| 4.5     | 3.76                         | 3.68   | 3.09                 | 3.01   | 0.67                      | 0.67   | 17.82                                       | 18.21  |
| 5.0     | 3.81                         | 3.73   | 3.15                 | 3.07   | 0.66                      | 0.66   | 17.32                                       | 17.69  |
| 10.0    | 4.13                         | 3.96   | 3.52                 | 3.35   | 0.61                      | 0.61   | 14.80                                       | 15.43  |
| 15.0    | 4.24                         | 3.98   | 3.68                 | 3.42   | 0.56                      | 0.56   | 13.22                                       | 14.08  |
| 20.0    | 4.32                         | 3.97   | 3.81                 | 3.46   | 0.51                      | 0.51   | 11.76                                       | 12.79  |
| 25.0    | 4.37                         | 3.92   | 3.91                 | 3.47   | 0.46                      | 0.46   | 10.49                                       | 11.67  |
| 30.0    | 4.40                         | 3.87   | 3.97                 | 3.43   | 0.44                      | 0.44   | 9.90                                        | 11.28  |
| 35.0    | 4.43                         | 3.80   | 4.01                 | 3.38   | 0.42                      | 0.42   | 9.43                                        | 11.01  |
| 40.0    | 4.46                         | 3.73   | 4.06                 | 3.33   | 0.39                      | 0.39   | 8.84                                        | 10.57  |
| 45.0    | 4.48                         | 3.65   | 4.10                 | 3.28   | 0.38                      | 0.38   | 8.40                                        | 10.30  |
| 50.0    | 4.50                         | 3.58   | 4.14                 | 3.21   | 0.36                      | 0.36   | 8.04                                        | 10.11  |

**Table S4.** Absolute and excess hydrogen uptakes in Co-MIL-88A with and without electrostatic interaction at 298 K

| P (bar) | LJ+Coulomb Interaction (wt%) |        | LJ Interaction (wt%) |        | Coulomb Interaction (wt%) |        | Percentage of Electrostatic Interaction (%) |        |
|---------|------------------------------|--------|----------------------|--------|---------------------------|--------|---------------------------------------------|--------|
|         | Absolute                     | Excess | Absolute             | Excess | Absolute                  | Excess | Absolute                                    | Excess |
| 1       | 0.0083                       | 0.0040 | 0.0079               | 0.0037 | 0.0004                    | 0.0004 | 4.24                                        | 8.69   |
| 5       | 0.041                        | 0.020  | 0.039                | 0.018  | 0.002                     | 0.002  | 3.98                                        | 8.28   |
| 10      | 0.080                        | 0.038  | 0.077                | 0.035  | 0.003                     | 0.003  | 3.70                                        | 7.86   |
| 15      | 0.118                        | 0.055  | 0.114                | 0.051  | 0.004                     | 0.004  | 3.35                                        | 7.22   |
| 20      | 0.155                        | 0.071  | 0.150                | 0.066  | 0.005                     | 0.005  | 3.15                                        | 6.91   |
| 25      | 0.189                        | 0.084  | 0.182                | 0.077  | 0.006                     | 0.006  | 3.38                                        | 7.64   |
| 30      | 0.222                        | 0.096  | 0.214                | 0.088  | 0.008                     | 0.008  | 3.71                                        | 8.57   |
| 35      | 0.253                        | 0.106  | 0.245                | 0.099  | 0.007                     | 0.007  | 2.91                                        | 6.93   |
| 40      | 0.286                        | 0.118  | 0.277                | 0.109  | 0.009                     | 0.009  | 3.16                                        | 7.63   |
| 45      | 0.318                        | 0.130  | 0.306                | 0.119  | 0.011                     | 0.011  | 3.61                                        | 8.83   |
| 50      | 0.350                        | 0.141  | 0.337                | 0.129  | 0.013                     | 0.013  | 3.59                                        | 8.87   |
| 60      | 0.412                        | 0.163  | 0.397                | 0.148  | 0.015                     | 0.015  | 3.64                                        | 9.19   |
| 70      | 0.470                        | 0.180  | 0.452                | 0.162  | 0.018                     | 0.018  | 3.83                                        | 9.99   |
| 80      | 0.527                        | 0.197  | 0.509                | 0.180  | 0.018                     | 0.018  | 3.35                                        | 8.96   |
| 90      | 0.579                        | 0.210  | 0.560                | 0.190  | 0.019                     | 0.019  | 3.32                                        | 9.17   |
| 100     | 0.631                        | 0.222  | 0.609                | 0.201  | 0.022                     | 0.022  | 3.43                                        | 9.75   |

**Table S5.** The average distance between the H<sub>2</sub> molecule and the nearest atoms of Co-MIL-88A (in Å)

| Sites         | GCMC | DFT  |
|---------------|------|------|
| Hollow        | 3.19 | 3.20 |
| Ligand        | 3.64 | 3.41 |
| Metal side-on | 2.77 | 3.14 |
| Metal end-on  | 2.58 | 3.15 |



**Table S6.** The structure of the optimized Co-MIL-88A (the POSCAR format of VASP)

```
Co-MIL-88A
11.22220000000000
  1.0000000000000000 0.000000000000000 0.000000000000000
 -0.4999999999999998 0.8660254037844388 0.000000000000000
  0.0000000000000010 0.0000000000000020 1.3116000000000001
  H C O Co
  12 24 26 6
Direct
0.5753655182525063 0.1539288745201919 0.9736932754453455
0.8460751308184772 0.4212869233714625 0.9736636678655390
0.5785415767105456 0.4245924781705243 0.9736612303969319
0.5753655182525063 0.1539288745201919 0.5263066933718400
0.8460751308184772 0.4212869233714625 0.5263363009516464
0.5785415767105456 0.4245924781705243 0.5263387384202536
0.1539357948166553 0.5755322808740659 0.0263277690666836
0.4213021226878529 0.8461034622366895 0.0263130782336863
0.4248003961115691 0.5787366393329931 0.0262948675373105
0.1539357948166553 0.5755322808740659 0.4736722205390496
0.4213021226878529 0.8461034622366895 0.4736869113720469
0.4248003961115691 0.5787366393329931 0.4737051220684227
0.5466659005847795 0.0960856617893677 0.1169809288299098
0.9038971471360248 0.4506893992193957 0.1169587073796239
0.5495868752647136 0.4534306560693983 0.1169557174156765
0.5466659005847795 0.0960856617893677 0.3830190607758234
0.9038971471360248 0.4506893992193957 0.3830412822261093
0.5495868752647136 0.4534306560693983 0.3830442721900568
0.0961411840247371 0.5465674082450029 0.8830453362778168
0.4506381609806948 0.9038773198073615 0.8830050977043666
0.4530805108753685 0.5491375504336760 0.8830024316105433
0.0961411840247371 0.5465674082450029 0.6169546325393687
0.4506381609806948 0.9038773198073615 0.6169948711128188
0.4530805108753685 0.5491375504336760 0.6169975372066422
0.5298378976707773 0.0630320631331601 0.0174288882601576
0.9369440105871333 0.4669311787123340 0.0174111719540563
0.5331228700754459 0.4700567666212462 0.0174109566428173
0.5298378976707773 0.0630320631331601 0.4825711013455756
0.9369440105871333 0.4669311787123340 0.4825888176516769
0.5331228700754459 0.4700567666212462 0.4825890329629159
0.0630522645213207 0.5300391731846326 0.9825963072745354
0.4668674739445529 0.9369786437667679 0.9825548426665409
0.4699868099148831 0.5330113623903856 0.9825822796437966
0.0630522645213207 0.5300391731846326 0.5174036615426501
0.4668674739445529 0.9369786437667679 0.5174451261506516
0.4699868099148831 0.5330113623903856 0.5174176891733888
0.4539213114979276 0.1148335366363431 0.1529994574815462
0.8851572760035797 0.3392856161969601 0.1529721207210744
0.6609670612222381 0.5463165702499073 0.1529495332707086
0.4539213114979276 0.1148335366363431 0.3470005321241799
0.8851572760035797 0.3392856161969601 0.34702786888465188
0.6609670612222381 0.5463165702499073 0.3470504563350176
0.1146280828690023 0.4537197023062354 0.8470842057404494
0.3392464813875953 0.8852609699604856 0.8469708444328599
0.5457827204728928 0.6606627973903835 0.8469784545305153
0.1146280828690023 0.4537197023062354 0.6529157630767431
0.3392464813875953 0.8852609699604856 0.6530291243843327
0.5457827204728928 0.6606627973903835 0.6530215142866772
0.6568802599167038 0.1120275356161742 0.1533026751975000
0.8879898153592521 0.5450695141550302 0.1532957483961259
0.4553861120868809 0.3430735947291598 0.1532725066995365
0.6568802599167038 0.1120275356161742 0.3466973144082332
0.8879898153592521 0.5450695141550302 0.3467042412096074
0.4553861120868809 0.3430735947291598 0.3467274829061967
0.1123154662482705 0.6569626133849756 0.8466918854243487
0.5448806446145089 0.8877997541875062 0.8467236967213784
0.3428927740112013 0.4547913120362192 0.8466947113482174
0.1123154662482705 0.6569626133849756 0.6533080833928367
0.5448806446145089 0.8877997541875062 0.6532762720958071
0.3428927740112013 0.4547913120362192 0.6533052574689610
0.6665951903146196 0.3333418282436607 0.2499999948028631
0.3333928430472100 0.6667234411542977 0.7499999844085963
0.4787164609619973 0.2405081828716842 0.2499999948028631
0.2381535604793789 0.7594388298342865 0.7499999844085963
0.5212633270197765 0.7618115686250516 0.7499999844085963
0.2404029324859905 0.4784954920472196 0.7499999844085963
0.7595132335803607 0.2381225681740184 0.2499999948028631
0.7618942454171965 0.5213384889630274 0.2499999948028631
```
